# Supplementary material for: Extended indirect calorimetry with isotopic CO2 sensors for prolonged and continuous quantification of exogenous vs. total substrate oxidation in mice
Source: PubMed Central journal article supplement (PMC6687832; doi:10.1038/s41598-019-47977-w), 2019-08-08
Supplement: 41598_2019_47977_MOESM1_ESM.pdf [file 41598_2019_47977_MOESM1_ESM.pdf]

**Supplementary information for:**

**Extended indirect calorimetry with isotopic CO<sub>2</sub> sensors for prolonged and continuous quantification of exogenous vs. total substrate oxidation in mice**

José MS Fernández-Calleja<sup>1</sup>, Lianne MS Bouwman<sup>1</sup>, Hans JM Swarts<sup>1</sup>, Annemarie Oosting<sup>2</sup>, Jaap Keijer<sup>1</sup>, Evert M van Schothorst<sup>1\*</sup>

<sup>1</sup>Human and Animal Physiology, Wageningen University, De Elst 1, Wageningen 6708 WD, The Netherlands

<sup>2</sup>Danone Nutricia Research, Uppsalalaan 12, Utrecht 3584 CT, The Netherlands

**Supplementary Table S1 and Supplementary Figures S1 and S2**

**Supplementary Table S1.** Metabolic characteristics of the female C57BL/6JRccHsd mice fed HDD and LDD from postnatal week (PW) 4 to PW 6, and HFD from PW 7 to PW 15 (second mouse study).

| Parameter                                                 | PW 6                 |                      |                 | PW 15             |                   |                 |
|-----------------------------------------------------------|----------------------|----------------------|-----------------|-------------------|-------------------|-----------------|
|                                                           | HDD                  | LDD                  | <i>P</i> -value | HDD               | LDD               | <i>P</i> -value |
| BW (g)                                                    | 17.02 (15.40, 19.28) | 17.42 (15.35, 18.49) | 0.0266          | 30.69 ± 3.00      | 32.44 ± 3.63      | 0.0744          |
| FM (g)                                                    | 1.51 (0.76, 2.83)    | 1.47 (0.82, 2.65)    | 0.8902          | 9.38 ± 2.47       | 11.04 ± 3.06      | 0.0442          |
| LM (g)                                                    | 14.56 ± 0.70         | 14.83 ± 0.67         | 0.1794          | 19.87 ± 0.91      | 19.90 ± 0.69      | 0.8744          |
| FM gain (g) <sup>1</sup>                                  | 0.63 (0.02, 1.96)    | 0.66 (-0.07, 1.80)   | 0.9425          | 7.85 ± 2.29       | 9.48 ± 2.96       | 0.0381          |
| dEI (MJ) <sup>1</sup>                                     | 0.88 (0.73, 1.05)    | 0.97 (0.86, 1.04)    | < 0.0001        | 3.67 ± 0.30       | 3.71 ± 0.25       | 0.5839          |
| 24 h EE (kJ d <sup>-1</sup> ) <sup>2</sup>                | ND                   | ND                   | -               | 43.93 ± 2.91      | 44.55 ± 2.99      | 0.4745          |
| 24 h RER <sup>3</sup>                                     | ND                   | ND                   | -               | 0.82 ± 0.04       | 0.80 ± 0.03       | 0.0698          |
| ΔRER (RER <sub>44</sub> – RER <sub>0</sub> ) <sup>2</sup> | ND                   | ND                   | -               | 0.17 (0.10, 0.19) | 0.16 (0.11, 0.20) | 0.4436          |
| Fasting glucose (mmol l <sup>-1</sup> )                   | ND                   | ND                   | -               | 5.8 (4.9, 7.2)    | 6.0 (5.2, 7.1)    | 0.5245          |
| Fasting insulin (ng ml <sup>-1</sup> )                    | ND                   | ND                   | -               | 2.72 (0.85, 8.95) | 2.31 (1.06, 3.45) | 0.6049          |
| Postprandial glucose (mmol l <sup>-1</sup> )              | ND                   | ND                   | -               | 7.1 ± 1.3         | 6.8 ± 1.7         | 0.6811          |
| Postprandial insulin (ng ml <sup>-1</sup> )               | ND                   | ND                   | -               | 4.31 ± 2.85       | 4.48 ± 1.42       | 0.8622          |

**Supplementary Table S1.** Metabolic characteristics of the female C57BL/6JRccHsd mice fed HDD and LDD from postnatal week (PW) 4 to PW 6, and HFD from PW 7 to PW 15 (second mouse study). <sup>1</sup>Measured from PW 4 to PW 6 (post-weaning period on HDD or LDD), or from PW 7 to PW 15 (HFD-feeding). <sup>2</sup>Measured in PW 14-15. HFD, high-fat diet; HDD, highly-digestible starch diet; LDD, lowly-digestible starch diet; BW, body weight; dEI, digestible energy intake; FM, fat mass; LM, lean mass; EE, energy expenditure; ND, not determined; RER, respiratory exchange ratio (mean of 24 h). Data was analysed separately for PW 6 and PW 15 time points using a Student's *t*-test (normally

distributed data) or a Mann Whitney test (non-normally distributed data). Data is presented as median and range (BW PW 6, FM PW 6, FM gain PW 6, dEI PW 6,  $\Delta$ RER, fasting blood glucose, fasting blood insulin) or otherwise as mean  $\pm$  SD,  $n = 24$  per group (except  $\Delta$ RER, HDD:  $n = 24$ , LDD:  $n = 23$ ; fasting glucose and insulin,  $n = 12$  per group; and postprandial glucose and insulin, HDD:  $n = 11$ , LDD:  $n = 12$ )

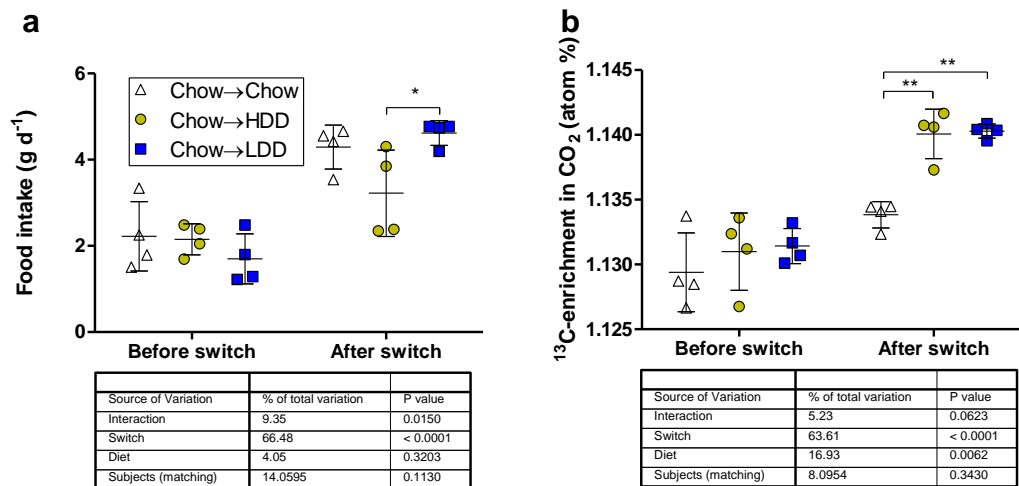

**Supplementary Figure S1.** Changes in food intake and <sup>13</sup>CO<sub>2</sub> enrichment in mice fed chow and then switched HDD or LDD, or remaining on chow. Chow-fed mice ( $n = 12$ ) were adapted to indirect calorimetry cages for 2 d, after which mice were allowed a restricted amount (1.1 g) of chow 1 h before the onset of the dark phase. At the end of the following light phase, mice were re-fed with a restricted amount (1.1 g) of chow, or HDD or LDD ( $n = 4$ ). Before the following dark phase mice received *ad libitum* access to the same diet they were allocated the day before, and measurements continued for 5.5 d (see Fernández-Calleja *et al.*<sup>1</sup> for details). **(a)** 24 h cumulative food intake and **(b)** 24 h mean <sup>13</sup>C enrichment immediately before food restriction and the day after *ad libitum* re-feeding. Tables show statistical output of repeated-measures 2-way analysis of variance. \* $P < 0.05$ , \*\* $P < 0.01$ , Bonferroni multiple comparisons. Data is presented as mean  $\pm$  SD. HDD, highly digestible starch-diet; LDD, lowly digestible starch-diet.

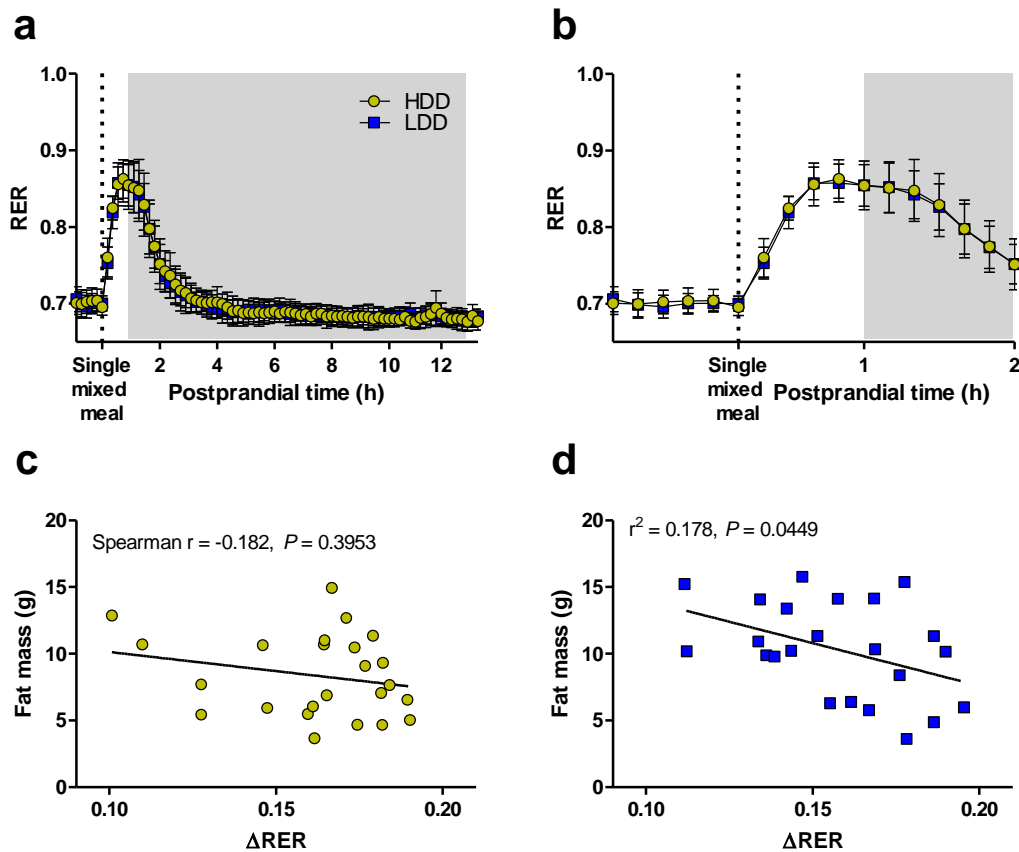

**Supplementary Figure S2.** Refeeding metabolic response to a liquid mixed meal and its relation to body fat mass (FM) in mice fed a HFD for nine weeks (second mouse study). **(a)** Respiratory exchange ratio (RER) was measured in PW 14-15 after gavage of a single liquid mixed meal containing 36 energy% glucose and 64 energy% fat in mice fed the HDD ( $n = 24$ ) or the LDD ( $n = 23$ ) during early life and subsequently fed a HFD for nine weeks. Data was analysed with repeated-measures 2-way analysis of variance to directly test the hypothesis that RER response is influenced by the post-weaning diet. There were no significant effects of the post-weaning diet or its interaction with time. Data is presented as mean  $\pm$  SD. Shaded areas represent the dark phase. **(b)** Data from panel **(a)**, emphasizing the early postprandial 2 h period. Correlation analysis between FM and the re-feeding response ( $\Delta$ RER), measured as the increase from baseline RER to RER at 44 min postprandial, in mice originally fed HDD **(c)** or LDD **(d)** during early post-weaning. HDD, highly digestible starch-diet; LDD, lowly digestible starch-diet.

## Reference

1. Fernández-Calleja, J. M. S. *et al.* Non-invasive continuous real-time *in vivo* analysis of microbial hydrogen production shows adaptation to fermentable carbohydrates in mice. *Sci. Rep.* **8**, 15351, doi:10.1038/s41598-018-33619-0 (2018).
